# Supplementary material
Source: MDPI journal article supplement (https://www.mdpi.com/2312-7481/4/4/52)
Supplement: s2 [file s2]

A dark blue outline of a house, consisting of a triangular roof and a rectangular base. The letters 'MDPI' are centered within the house shape.

**MDPI**
