# Supplementary material
Source: MDPI journal article supplement (https://www.mdpi.com/2312-7481/4/4/52)

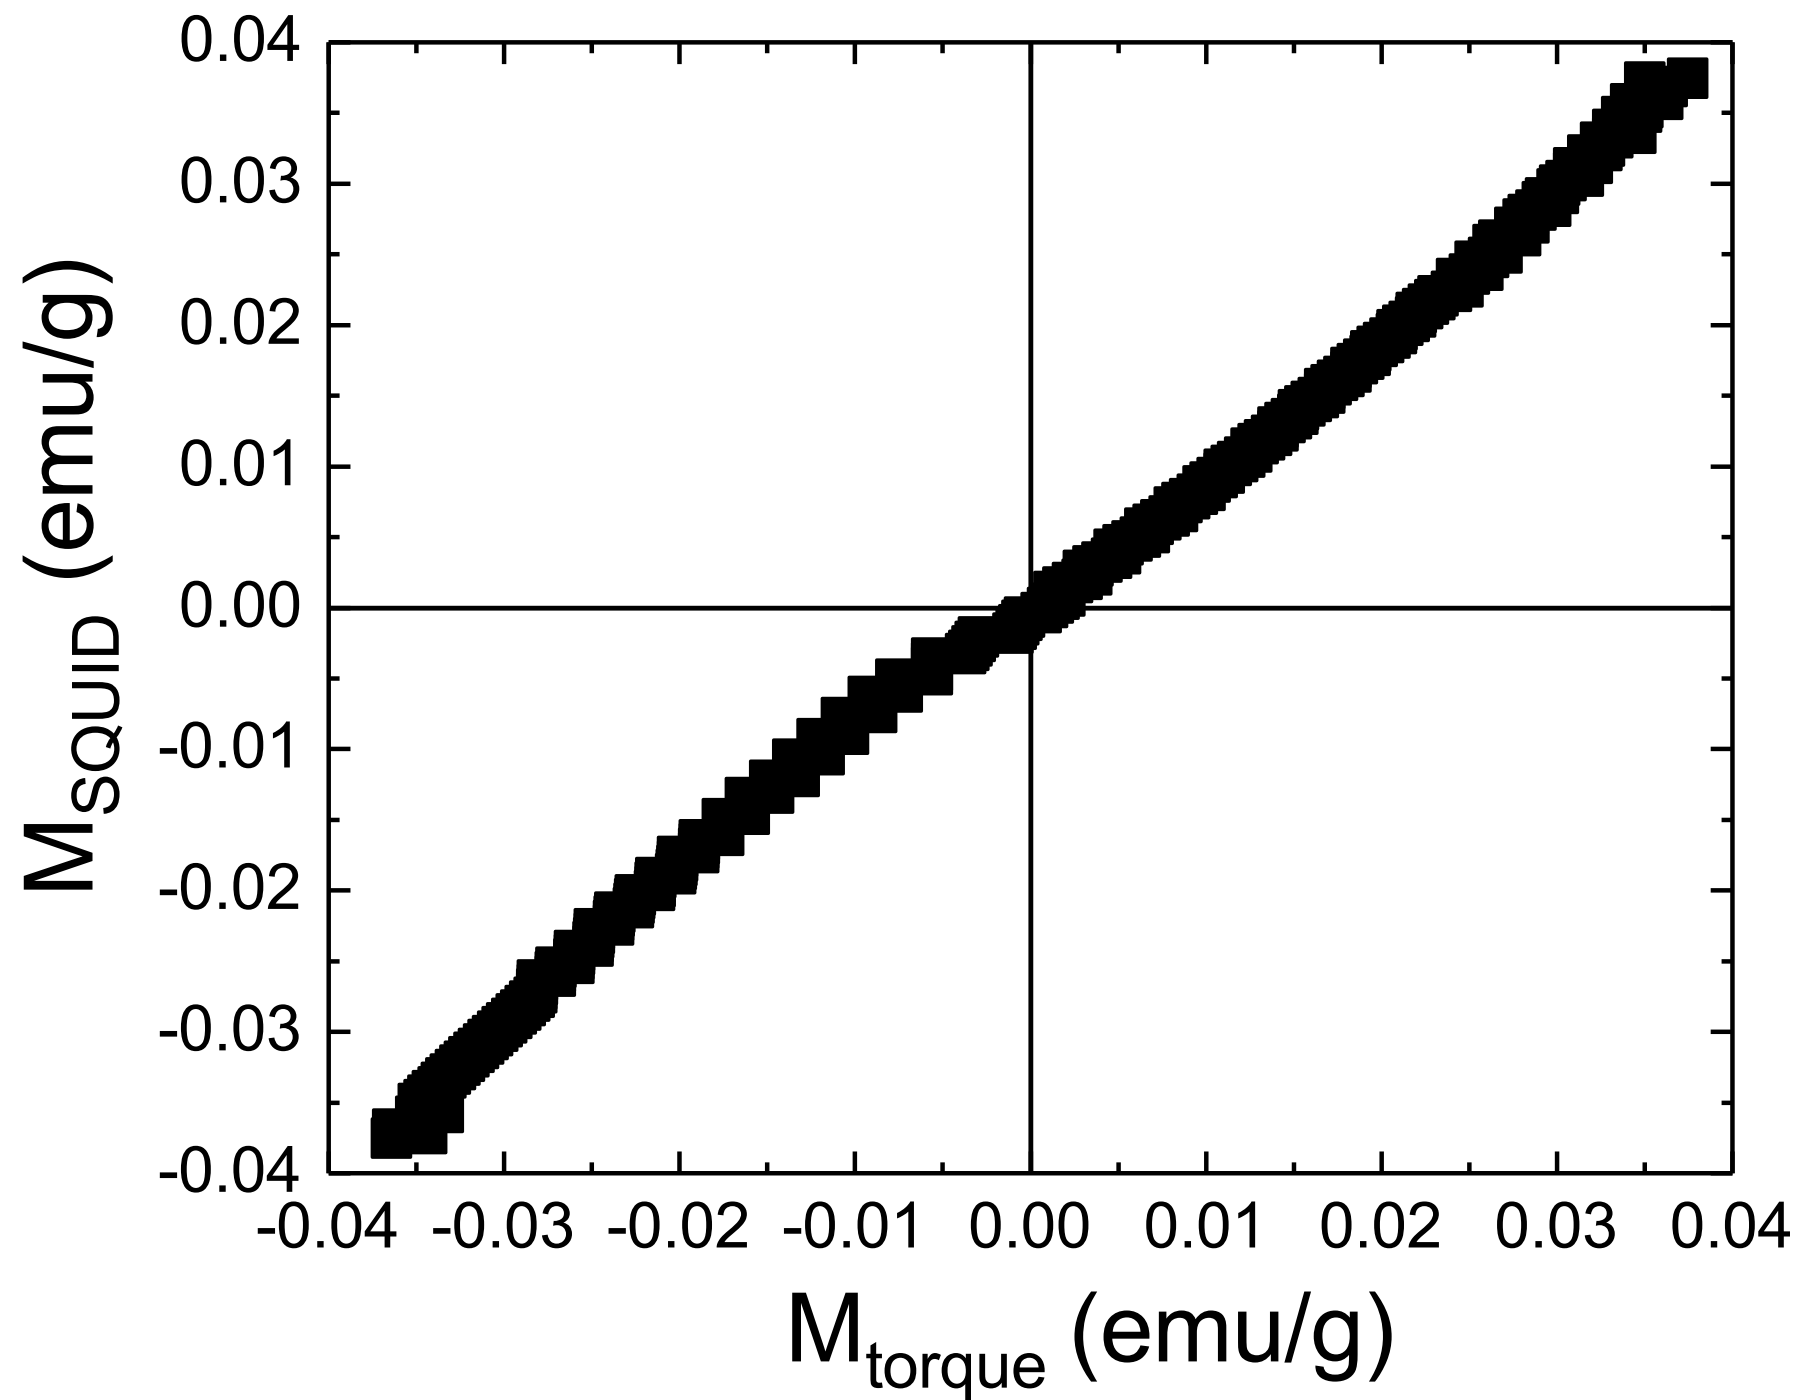

Supplement: s2 [file s2]

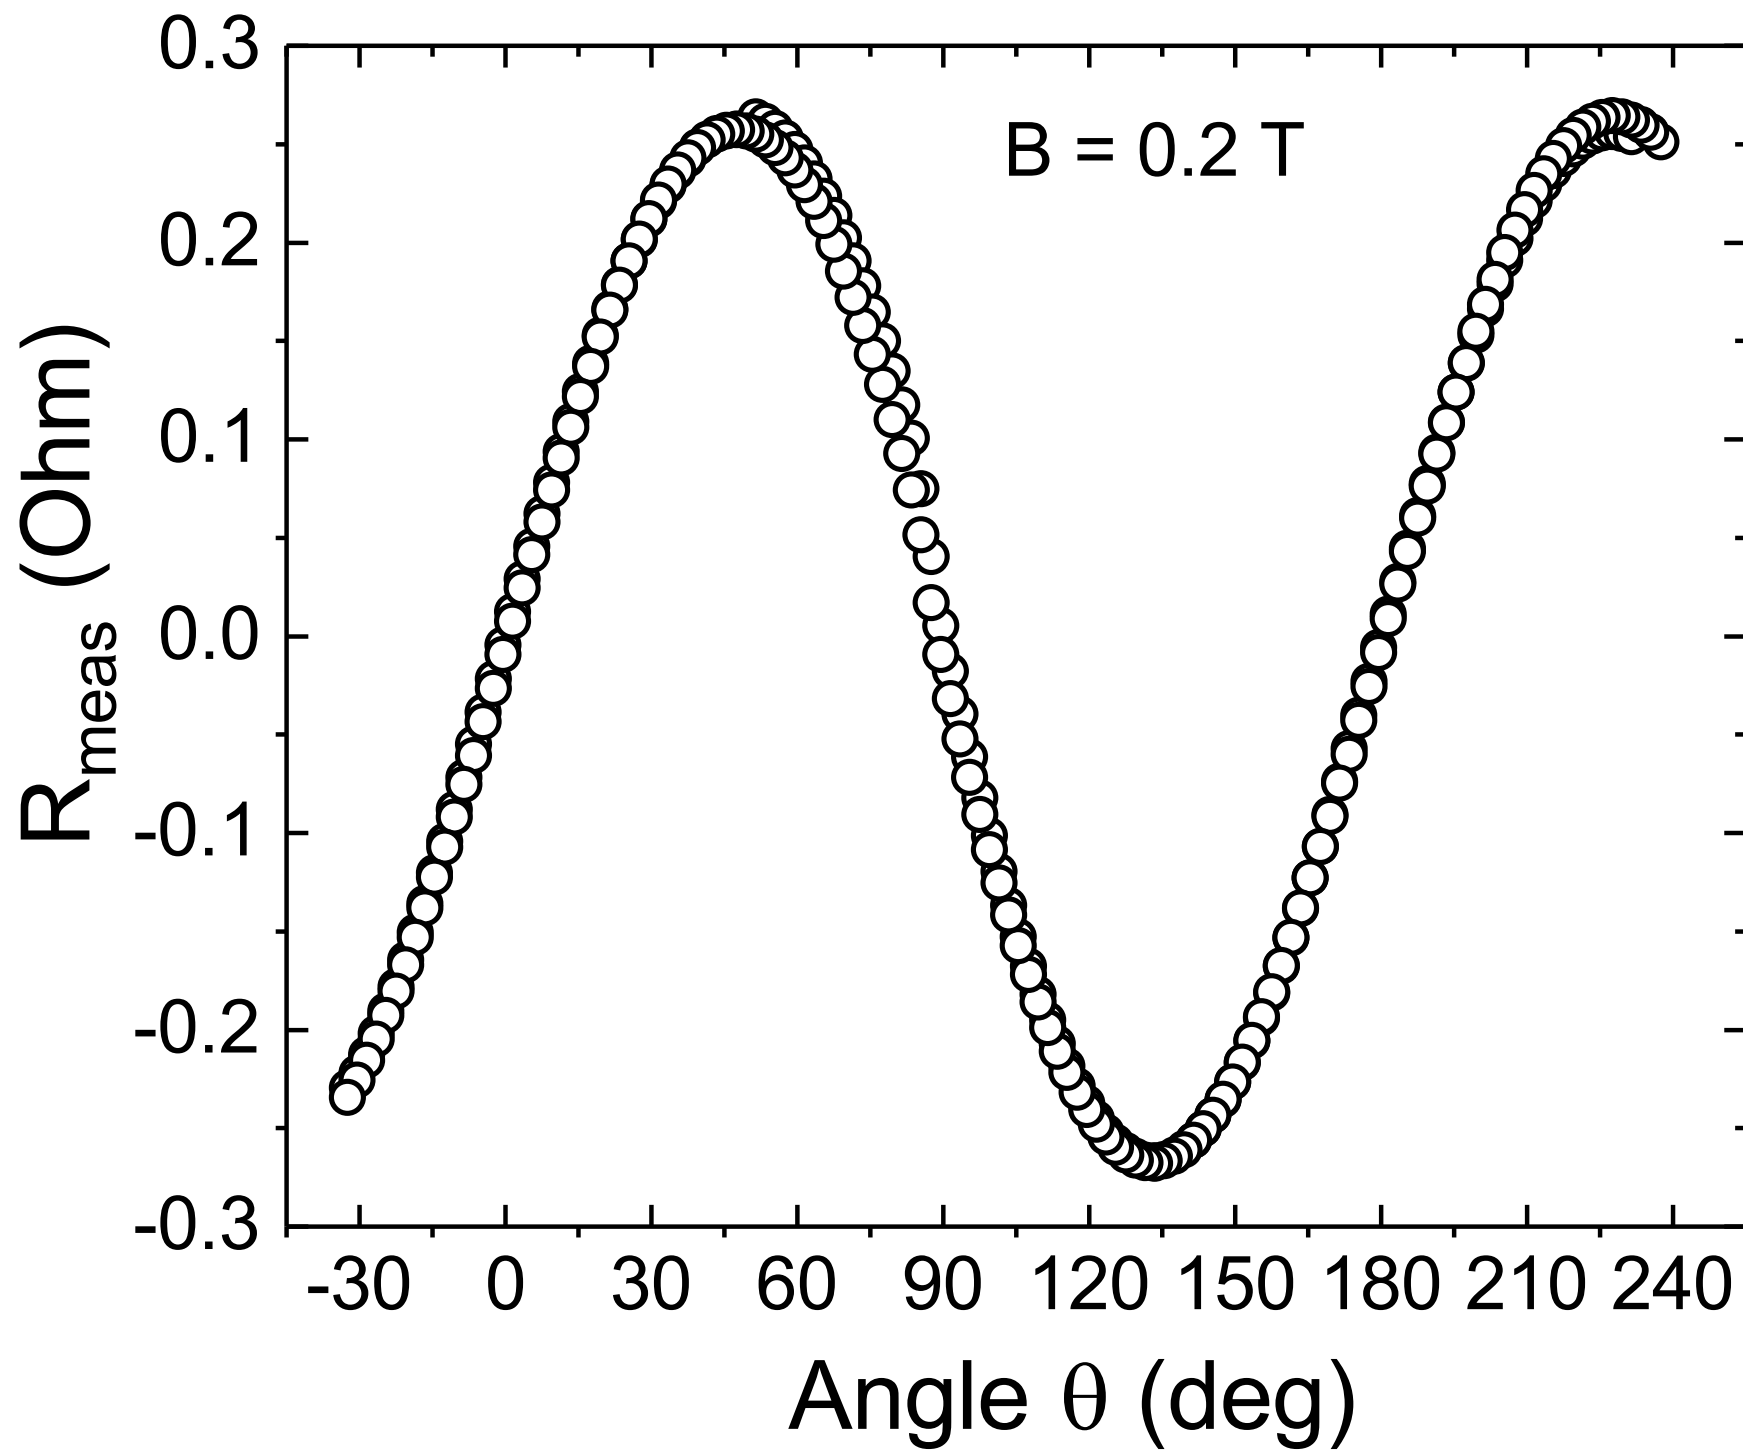

Supplement: s2 [file s2]

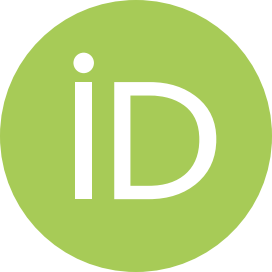

Supplement: s2 [file s2]

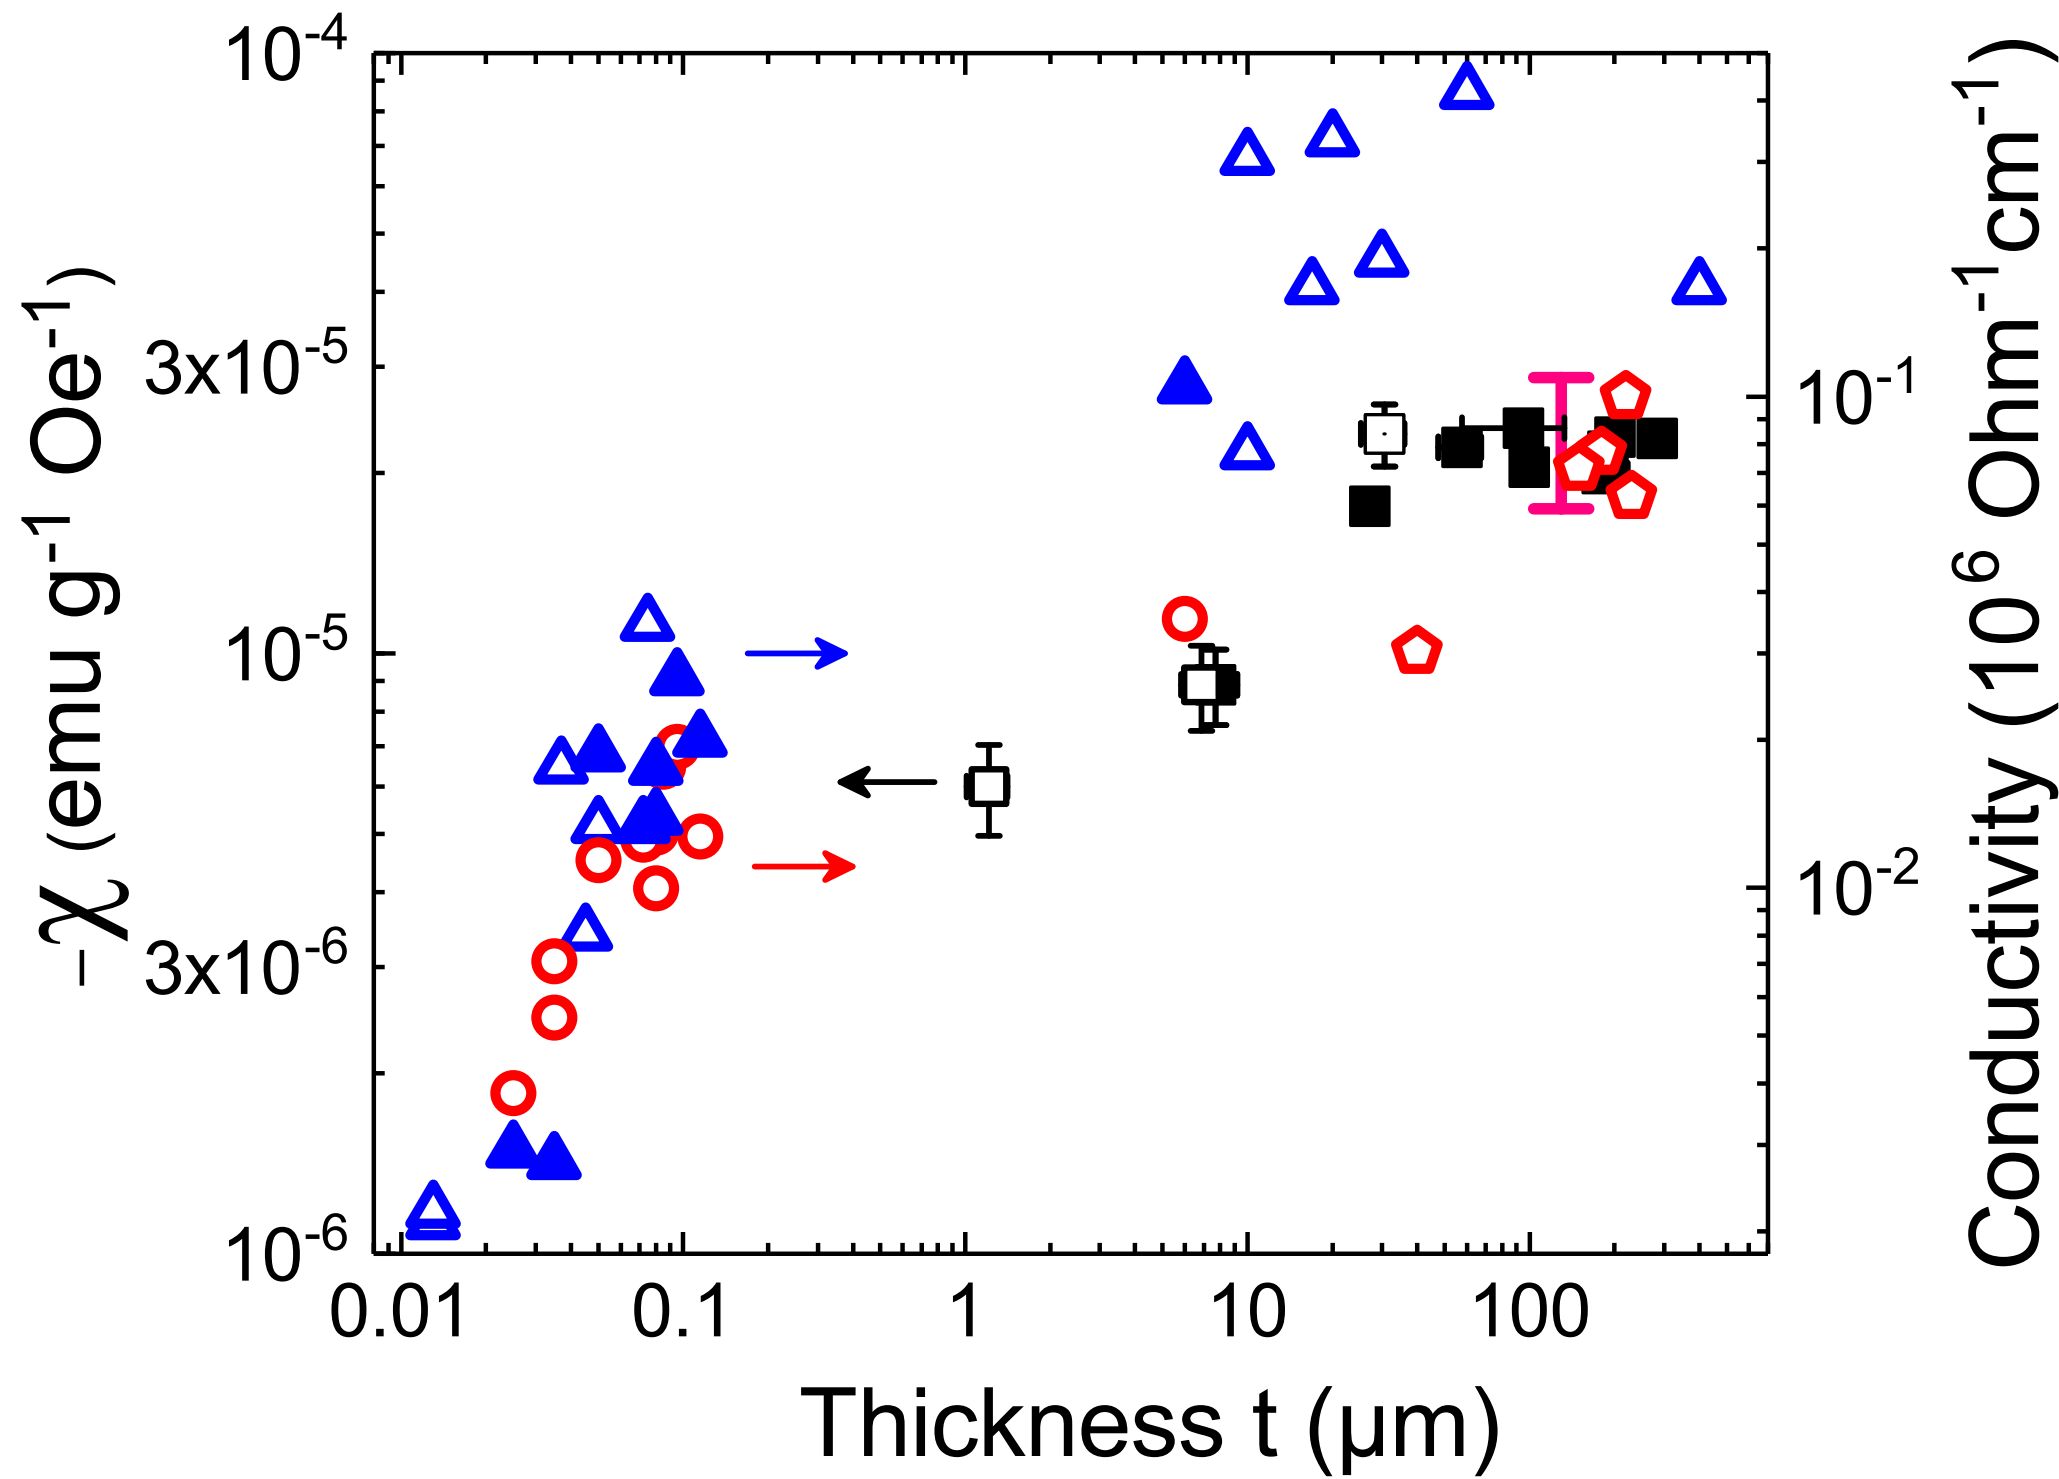

Supplement: s2 [file s2]

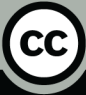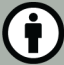

BY

Supplement: s2 [file s2]

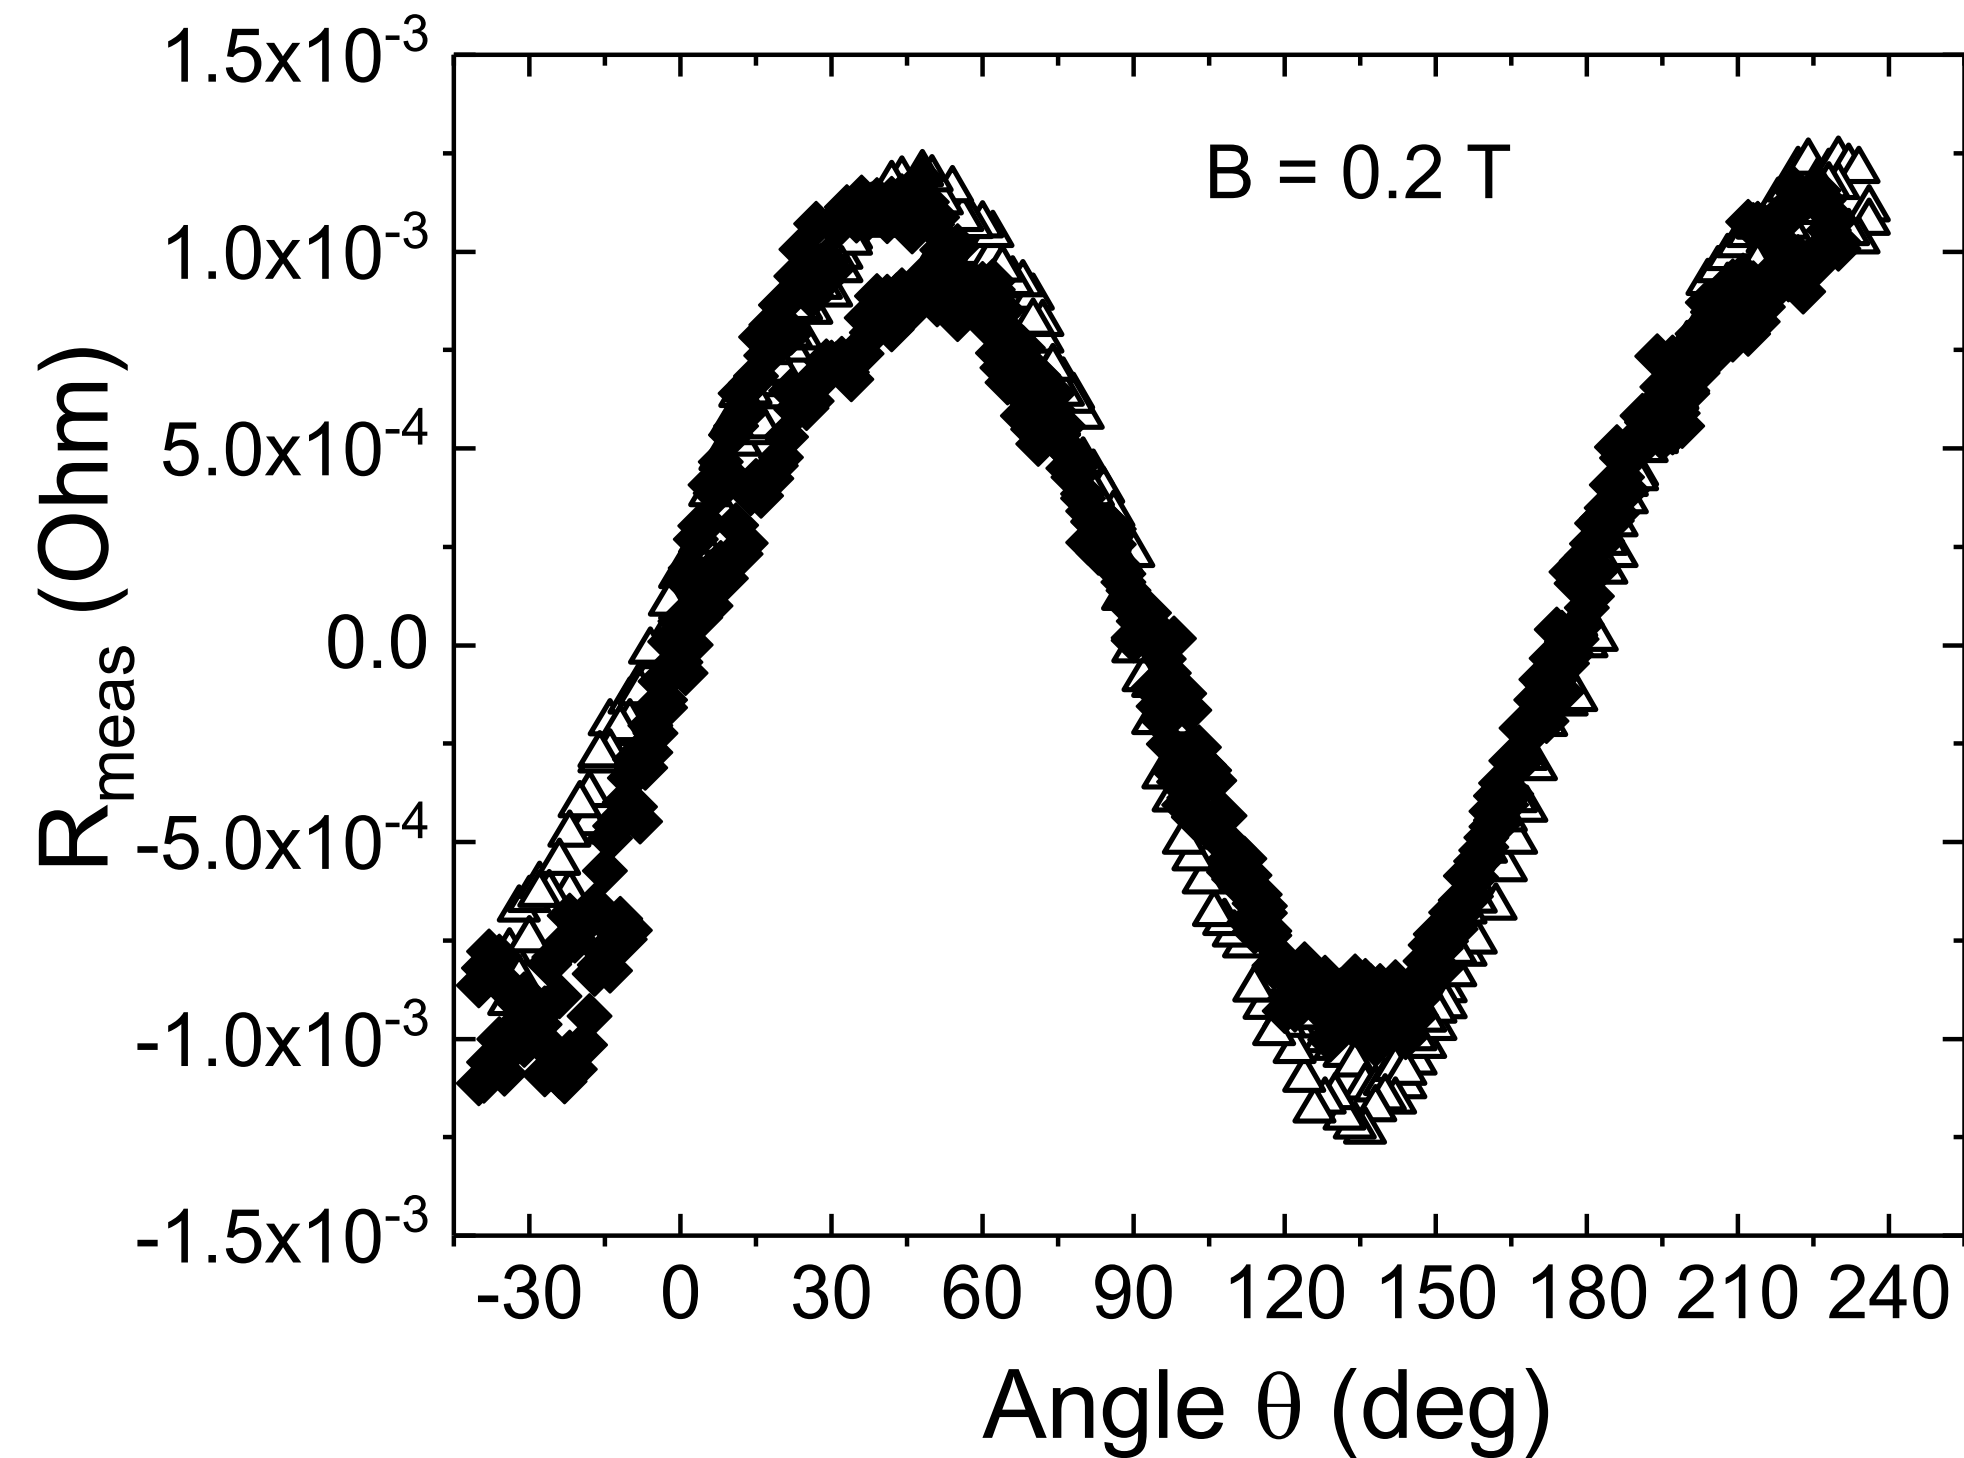

Supplement: s2 [file s2]

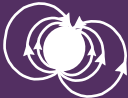

*magnetochemistry*

Supplement: s2 [file s2]

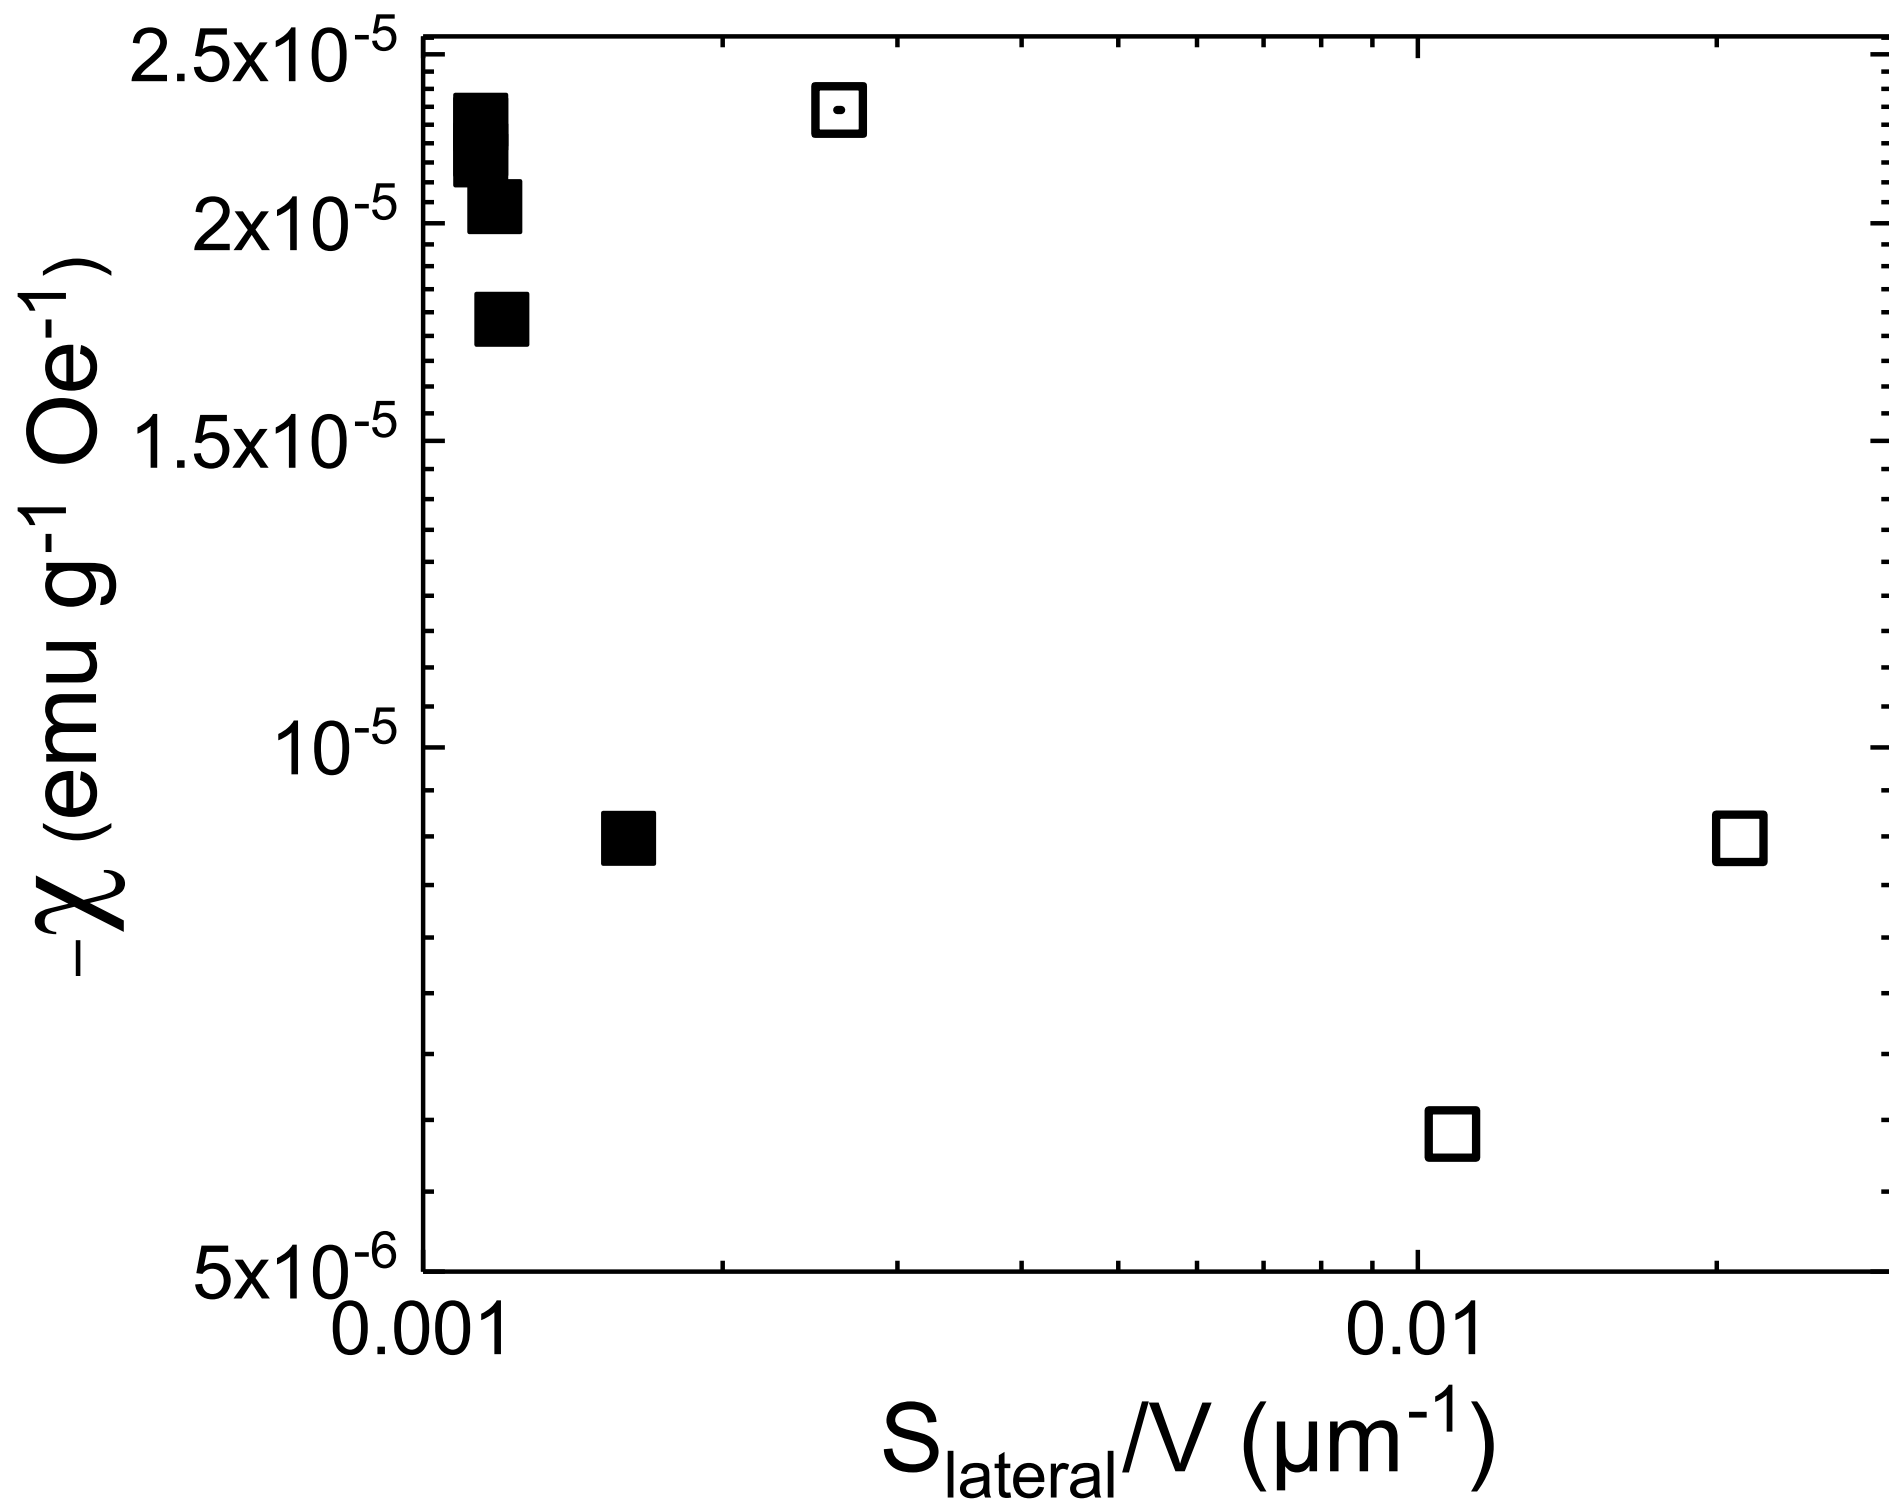

Supplement: s2 [file s2]

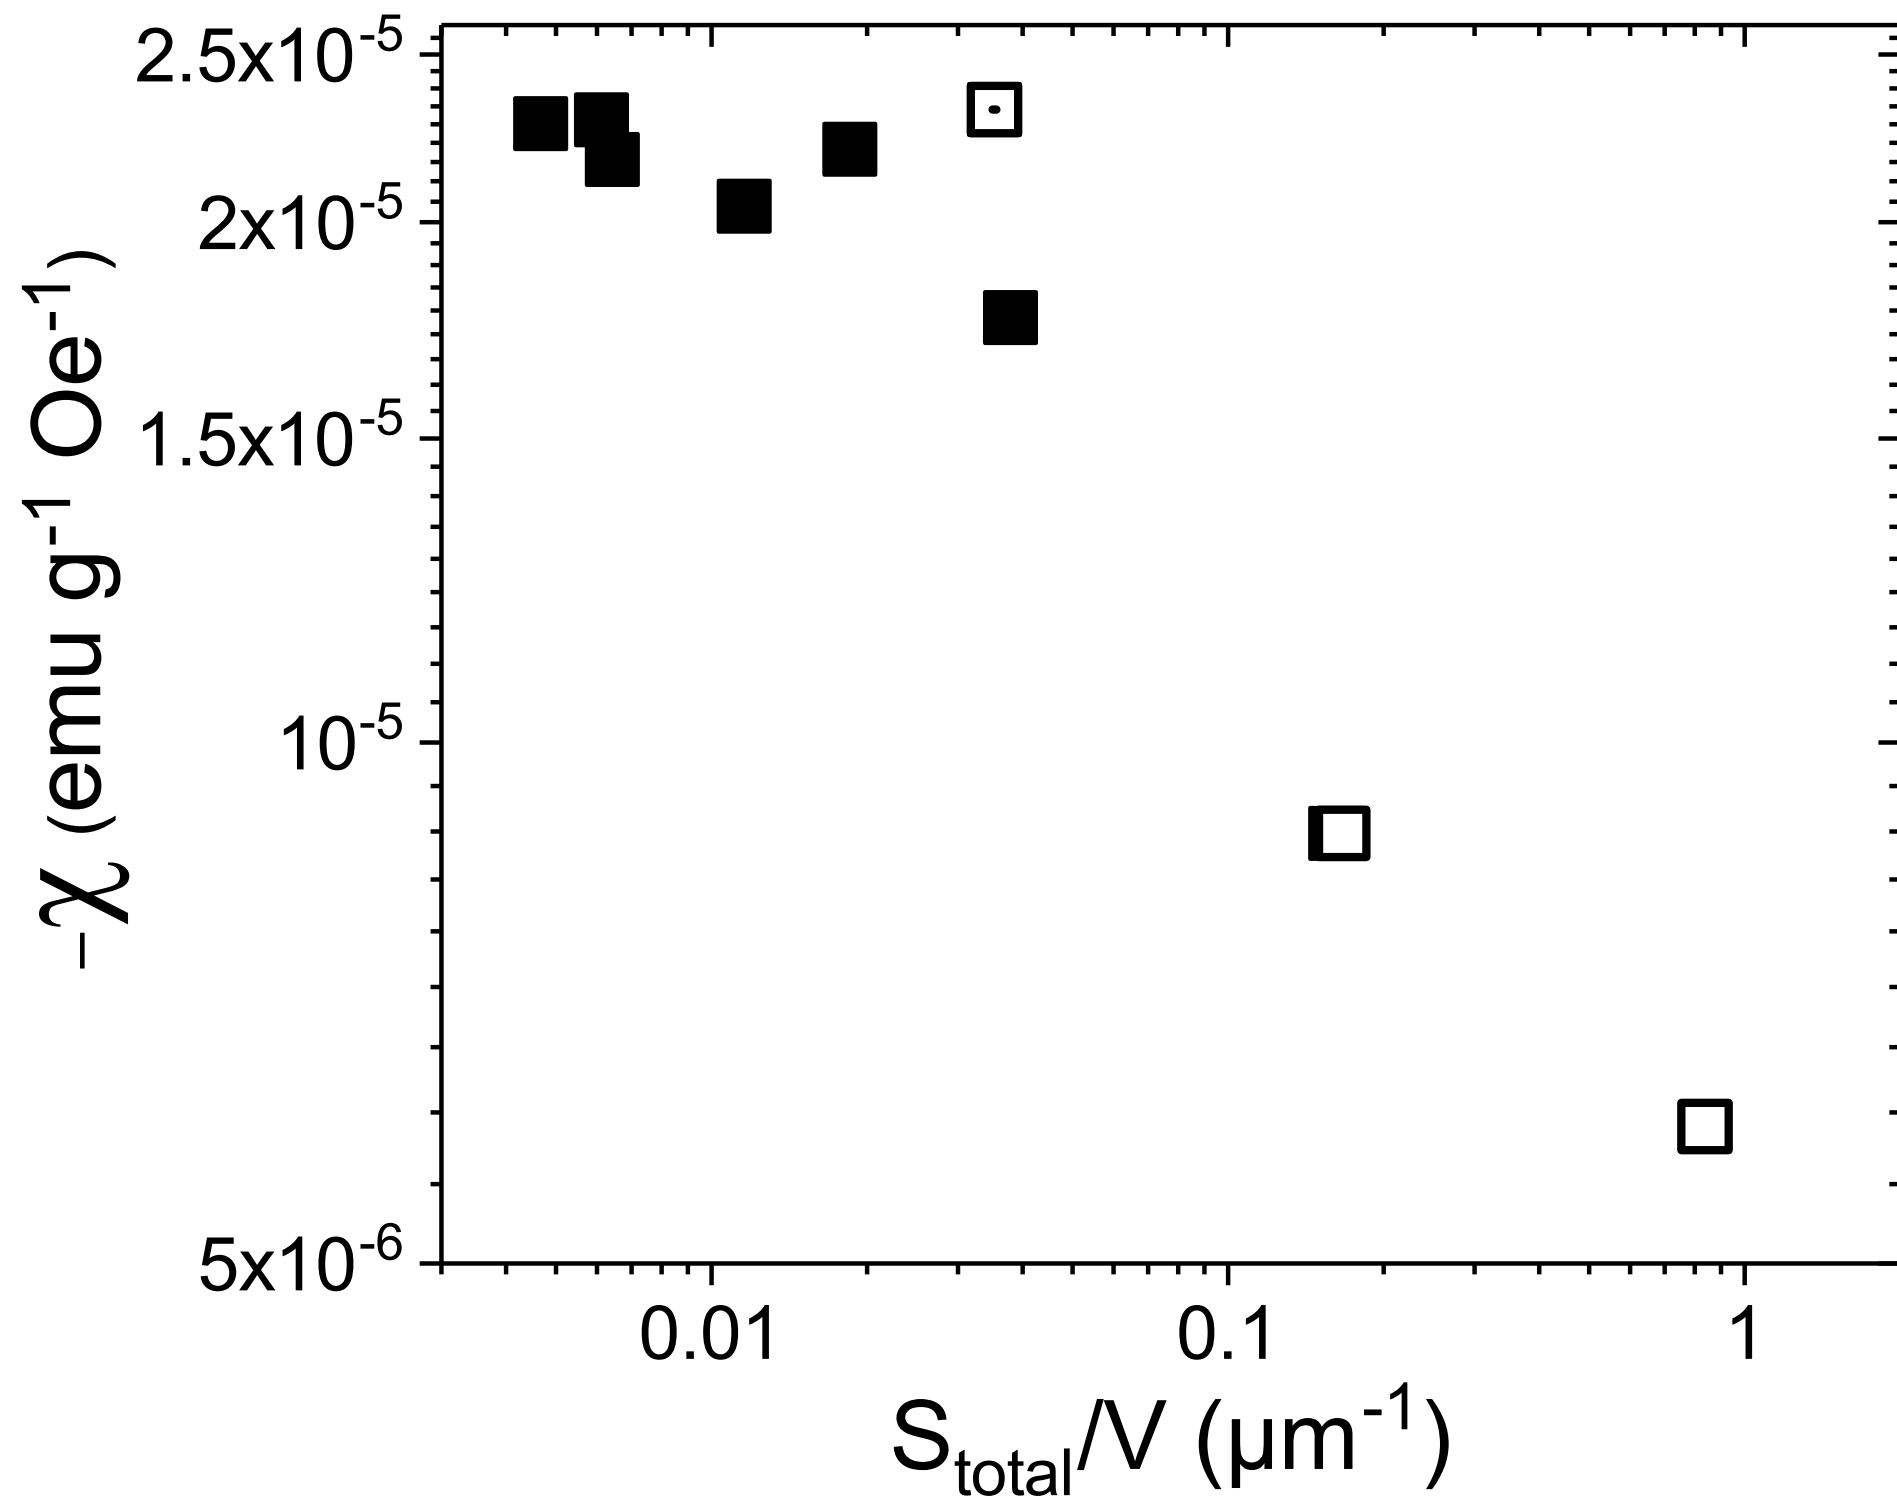

Supplement: s2 [file s2]
